# Supplementary material
Source: PubMed Central journal article supplement (PMC2661972)
Supplement: NIHMS88214-supplement-01.pdf [file NIHMS88214-supplement-01.pdf]

Supplementary Data Table 1- Relative gene expression normalized to Myosin VIIa

|                                                 |              | Average $C_{T(s)} \pm SD$ | Average $C_{T(m)} \pm SD$ | $\Delta C_T \pm SD$ | $\Delta \Delta C_T$ | normalized expression level to myosin VIIa ( $2^{-\Delta \Delta C_T}$ ) |
|-------------------------------------------------|--------------|---------------------------|---------------------------|---------------------|---------------------|-------------------------------------------------------------------------|
| <b>Genotype</b>                                 | <b>Gene</b>  |                           |                           |                     |                     |                                                                         |
| SK2 <sup>-/-</sup>                              | $\alpha 9$   | 27.71 $\pm$ 0.94          | 26.43 $\pm$ 0.08          | 1.28 $\pm$ 0.94     | -0.07               | <b>1.05</b>                                                             |
| SK2 <sup>+/+</sup>                              |              | 27.54 $\pm$ 0.11          | 26.19 $\pm$ 0.33          | 1.35 $\pm$ 0.35     |                     |                                                                         |
| SK2 <sup>-/-</sup> / $\alpha 10$ <sup>-/-</sup> |              | 31.24 $\pm$ 0.40          | 23.9 $\pm$ 0.27           | 7.34 $\pm$ 0.48     | 0.83                |                                                                         |
| SK2 <sup>+/+</sup> / $\alpha 10$ <sup>+/+</sup> |              | 30.40 $\pm$ 0.07          | 23.89 $\pm$ 0.37          | 6.51 $\pm$ 0.38     |                     |                                                                         |
| SK2 <sup>-/-</sup>                              | $\alpha 10$  | 28.76 $\pm$ 0.34          | 26.43 $\pm$ 0.08          | 2.33 $\pm$ 0.35     | -0.41               | <b>1.33</b>                                                             |
| SK2 <sup>+/+</sup>                              |              | 28.93 $\pm$ 0.47          | 26.19 $\pm$ 0.33          | 2.74 $\pm$ 0.57     |                     |                                                                         |
| SK2 <sup>-/-</sup>                              | CaV1.3       | 29.14 $\pm$ 0.27          | 26.43 $\pm$ 0.08          | 2.71 $\pm$ 0.28     | -0.04               | <b>1.02</b>                                                             |
| SK2 <sup>+/+</sup>                              |              | 28.94 $\pm$ 0.33          | 26.19 $\pm$ 0.33          | 2.75 $\pm$ 0.47     |                     |                                                                         |
| SK2 <sup>-/-</sup>                              | BK, alpha    | 25.53 $\pm$ 0.25          | 26.43 $\pm$ 0.08          | -0.90 $\pm$ 0.26    | -0.41               | <b>1.32</b>                                                             |
| SK2 <sup>+/+</sup>                              |              | 25.7 $\pm$ 0.24           | 26.19 $\pm$ 0.33          | -0.49 $\pm$ 0.41    |                     |                                                                         |
| SK2 <sup>-/-</sup>                              | BK, beta     | 27.38 $\pm$ 0.44          | 22.67 $\pm$ 0.31          | 4.73 $\pm$ 0.54     | 0.68                | <b>0.63</b>                                                             |
| SK2 <sup>+/+</sup>                              |              | 26.88 $\pm$ 0.19          | 22.83 $\pm$ 0.47          | 4.05 $\pm$ 0.51     |                     |                                                                         |
| SK2 <sup>-/-</sup>                              | Ryanodine R1 | 22.08 $\pm$ 0.74          | 22.67 $\pm$ 0.31          | -0.26 $\pm$ 0.80    | 1.93                | <b>0.26</b>                                                             |
| SK2 <sup>+/+</sup>                              |              | 20.31 $\pm$ 0.88          | 22.83 $\pm$ 0.47          | -2.19 $\pm$ 0.99    |                     |                                                                         |
| SK2 <sup>-/-</sup> / $\alpha 10$ <sup>-/-</sup> |              | 23.52 $\pm$ 0.28          | 23.9 $\pm$ 0.27           | -0.39 $\pm$ 0.39    | 1.31                |                                                                         |
| SK2 <sup>+/+</sup> / $\alpha 10$ <sup>+/+</sup> |              | 22.20 $\pm$ 0.08          | 23.89 $\pm$ 0.37          | -1.69 $\pm$ 0.38    |                     |                                                                         |
| SK2 <sup>-/-</sup>                              | Ryanodine R2 | 23.84 $\pm$ 0.29          | 22.67 $\pm$ 0.31          | 1.13 $\pm$ 0.42     | 1.10                | <b>0.47</b>                                                             |
| SK2 <sup>+/+</sup>                              |              | 22.82 $\pm$ 0.31          | 22.83 $\pm$ 0.47          | 0.03 $\pm$ 0.56     |                     |                                                                         |
| SK2 <sup>-/-</sup> / $\alpha 10$ <sup>-/-</sup> |              | 24.21 $\pm$ 0.10          | 23.9 $\pm$ 0.27           | 0.31 $\pm$ 0.29     | 0.36                |                                                                         |
| SK2 <sup>+/+</sup> / $\alpha 10$ <sup>+/+</sup> |              | 23.84 $\pm$ 0.11          | 23.89 $\pm$ 0.37          | -0.05 $\pm$ 0.39    |                     |                                                                         |
| SK2 <sup>-/-</sup>                              | Ryanodine R3 | 24.42 $\pm$ 0.39          | 22.67 $\pm$ 0.31          | 1.76 $\pm$ 0.50     | 0.26                | <b>0.84</b>                                                             |
| SK2 <sup>+/+</sup>                              |              | 24.33 $\pm$ 0.57          | 22.83 $\pm$ 0.47          | 1.50 $\pm$ 0.74     |                     |                                                                         |
| SK2 <sup>-/-</sup> / $\alpha 10$ <sup>-/-</sup> |              | 27.06 $\pm$ 0.16          | 23.9 $\pm$ 0.27           | 3.16 $\pm$ 0.31     | 0.48                |                                                                         |
| SK2 <sup>+/+</sup> / $\alpha 10$ <sup>+/+</sup> |              | 26.56 $\pm$ 0.85          | 23.89 $\pm$ 0.37          | 2.68 $\pm$ 0.93     |                     |                                                                         |

qPCR analysis of SK2<sup>-/-</sup> and SK2<sup>-/-</sup>/ $\alpha 10$ <sup>-/-</sup> cochleae. Expression level for genes with known olivocochlear system interactions was determined using the  $\Delta \Delta C_T$  method on triplicate technical repeats of a minimum of two biological repeats.
